# Supplementary material for: Pt- and Au-catalyzed oxidative cyclization of 2-ethenyl-1-(prop-2′-yn-1′-ol)benzenes to naphthyl aldehydes and ketones: catalytic oxidation of metal-alkylidene intermediates using H2O and H2O2
Source: Royal Society of Chemistry journal article supplement (doi:10.1039/b700659d), 2007-01-01
Supplement: b700659d.pdf [file b700659d.pdf]

# Supplementary Material (ESI) for Chemical Communications  
# This journal is (c) The Royal Society of Chemistry 2007

**Platinum and Gold-Catalyzed Oxidative Cyclization of 2-Ethenyl-1-(prop-2'-yn-1'-ol)benzenes to Naphthyl Aldehydes and Ketones: Catalytic Oxidation of Metal-Alkylidene Intermediates Using H<sub>2</sub>O and H<sub>2</sub>O<sub>2</sub>.**

Bhanu Pratap Taduri, Shariar Md. Abu Sohel, Hsin-Mei Cheng, Guan-You Lin and Rai-Shung Liu\*

Department of Chemistry, National Tsing-Hua University, Hsinchu, Taiwan, ROC  
e-mail: [rsliu@mx.nthu.edu.tw](mailto:rsliu@mx.nthu.edu.tw)

Contents:

- (1) Theoretic calculation for oxygenation of platinum-carbenoids with water----- S2.
- (2) Experimental procedures for the metal-catalyzed cyclization, cyclopropanation and measurement of hydrogen evolution----- S2-S3
- (3) Spectral data for compounds **1-42**----- S3-S19

**(1) Theoretic calculation:**

The relative energies are based on HF/LANL2DZdp level theory using the Gaussian 98 program. The optimized geometries for reactants and products were fully optimized. The zero-point energy contribution was not included.

Reference S1. Gaussian 98: M. J. Frisch, G. W. Trucks, H. B. Schlegel, P. M. W. Gill, B. G. Johnson, M. A. Robb, J. R. Cheeseman, T. Keith, G. A. Peterson, J. A. Montgomery, K. Raghavachari, M. A. Al-Laham, V. G. Zakrzewski, J. V. Ortiz, J. B. Foresman, J. Ciolowski, B. B. Stefanov, A. Nanayarkara, M. Challacombe, C. Y. Peng, P. Y. Ayala, W. Chen, M. W. Wong, J. L. Andres, E. S. Replogle, R. Gomperts, R. L. Martin, D. J. Fox, J. S. Binkley, D. J. Defrees, J. Baker, J. P. Stewart, M. Head-Gordon, C. Gonzalez and J. A. Pople, Gaussian, Inc., Pittsburgh PA, 1999.

**(2) Experimental procedure.**

**(a) General remarks:** Unless otherwise noted, all reactions were carried out under nitrogen atmosphere in oven-dried glassware using standard syringe, cannula and septa apparatus. Diethyl ether, tetrahydrofuran and hexane were dried with sodium benzophenone and distilled before use. Dichloromethane was dried over CaH<sub>2</sub> and distilled before use. All the <sup>1</sup>H NMR and <sup>13</sup>C NMR were recorded in in CDCl<sub>3</sub> solution.

**(b) Experimental procedure for Gold-catalyzed Oxidative cyclization**

To a solution of alcohol **1** (230 mg, 1.33 mmol) and AuClEt<sub>3</sub> (21.5 mg, 0.066 mmol) in 5 ml of DCE, was added H<sub>2</sub>O<sub>2</sub> (136 mg, 4 mmol). After the reaction mixture was stirred at 70 °C for 4h, the resulting solution was added with water (7 ml), extracted with ether twice. The combined extracts were dried over MgSO<sub>4</sub> and purified on a silical column (hexane-AcOEt 9:1) to give aldehyde **2** (181 mg, 1.07 mmol, 80%) as colorless liquid.

**(c) Representative procedure for PtCl<sub>2</sub>-catalyzed cyclization.**

A long tube containing PtCl<sub>2</sub> (5.8 mg, 0.021 mmol) was evacuated and charged with CO. After repeating this procedure twice, the tube was charged with propargylic alcohol **4** (100 mg, 0.43 mmol), 1.6 ml THF and water (157 mg, 8.77 mmol). The resulting mixture was stirred at 25 °C for 5 h. The solution was concentrated, and filtered through a small MgSO<sub>4</sub> bed. After removal of the solvent under reduced pressure, the residue was

# Supplementary Material (ESI) for Chemical Communications  
# This journal is (c) The Royal Society of Chemistry 2007

purified on a silica column (hexane-EtOAc 98:2) to give the olefin **5** (77.5 mg, 3.69 mmol, 84%) and ketone **31** (6 mg, 0.026 mmol, 6 %) as a colorless liquid.

**(d) Representative procedure for PtCl<sub>2</sub> catalyzed cyclopropanation:** A long tube containing PtCl<sub>2</sub> (11.4 mg, 0.043 mmol) was evacuated and backfilled with CO. After repeating the procedure twice, it was charged with propargylic alcohol **1** (150 mg, 0.87 mmol) and 3 ml dry THF. After immediate addition of styrene (907 mg, 8.72 mmol) the reaction mixture was left for stirring at room temperature for 3 h. After removal of the solvent under reduced pressure the residue was purified on silica column (hexane) to obtain the cyclopropane derivative (**3**) (175 mg, 0.68 mmol, 78%) as 9:1 *trans-cis* mixture.

**(e) Measurement of Hydrogen Evolvement in the PtCl<sub>2</sub>-Catalysis.** The volume of along reaction tubing was determined to have a volume 27 mL, which was charged with PtCl<sub>2</sub> (8.7 mg) before it was evacuated in vacuo. This reaction vessel was charged with CO, and to this vessel was added alcohol **1** (150 mg, 0.64 mmol), water (235 mg, 13.1 mmol) and 3 ml dry THF. The mixture was stirred at 25 °C for 5 h, and the gas sample was taken with a gas-tight syringe (1.5 mL). This gas sample was injected to a G.C. (China Chromatograph, model 8700T) and equipped with a MS-5Å column (5 feet) using a TCD-detector. The calibration factor of the H<sub>2</sub>-signal was determined through an injection of a 0.5 mL H<sub>2</sub>. The 1.5-ml sample was analyzed to have the amount of H<sub>2</sub> ca. 0.010 mmol. This measurement was repeated twice, which appeared to have ca. 15% error between the two trials. Notably, at long reaction period ca. 12 h, the amount of H<sub>2</sub> was rapidly dropped to be 0.003 mmol with the same 1.5-ml amount. After the H<sub>2</sub>-measurement, the solution was concentrated and eluted through a short column to afford aldehyde **2** in 75% yield (110 mg, 0.48 mmol).

### (3) Spectral data for the Compounds 1-41:

#### Spectral data for 1-(2-Isopropenyl-phenyl)-prop-2-ynyl-1-ol (**1**)

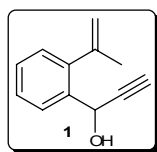

# Supplementary Material (ESI) for Chemical Communications  
# This journal is (c) The Royal Society of Chemistry 2007

IR (neat,  $\text{cm}^{-1}$ ): 3665 (m), 3312 (s), 2161(w), 1678 (m);  $^1\text{H}$  NMR (400 MHz,  $\text{CDCl}_3$ ):  $\delta$  7.48 (d,  $J = 7.6$  Hz, 1 H), 7.34~7.26 (m, 2 H), 7.15 (d,  $J = 7.6$  Hz, 1 H), 5.60 (s, 1H), 5.27 (s, 1 H), 4.95 (s, 1H), 2.60 (s, 1 H), 2.08 (s, 3 H);  $^{13}\text{C}$  NMR (100 MHz,  $\text{CDCl}_3$ ):  $\delta$  144.0, 142.6, 137.0, 128.3, 128.0, 127.5, 127.0, 116.2, 84.4, 74.3, 61.5, 25.3; HRMS calcd. for  $\text{C}_{12}\text{H}_{12}\text{O}$ : 172.0888; found 174.0884.

### Spectral data for 4-Methyl-naphthalene-2-carbaldehyde (2)

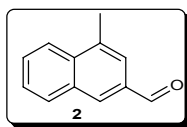

IR (neat,  $\text{cm}^{-1}$ ) 2856 (w), 2741 (w), 1689 (s);  $^1\text{H}$  NMR (400 MHz,  $\text{CDCl}_3$ ):  $\delta$  10.07 (s, 1H), 8.13 (s, 1 H), 8.00~7.95 (m, 2 H), 7.75 (s, 1 H), 7.64 (t, 1 H,  $J = 7.6$  Hz), 7.55 (t, 1 H,  $J = 7.6$  Hz), 2.68 (s, 3 H);  $^{13}\text{C}$  NMR (100 MHz,  $\text{CDCl}_3$ ):  $\delta$  192.3, 135.7, 133.6, 133.2(x2), 132.6, 130.1, 128.9, 126.6, 124.3, 12.7, 19.2. HRMS calcd for  $\text{C}_{12}\text{H}_{10}\text{O}$  ( $[\text{M} + \text{H}]^+$ ): 170.0732; found 170.0729.

### Spectral data for 1-methyl-3-(2-phenylcyclopropyl)naphthalene (3):

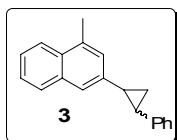

IR(neat, $\text{cm}^{-1}$ ): 3089 (m), 3071 (m); $^1\text{H}$  NMR (600 MHz,  $\text{CDCl}_3$ ): (*trans*:*cis* = 9:1), major *trans* isomer,  $\delta$  7.87~7.85 (m, 1 H), 7.67~7.65 (m, 1 H), 7.42~7.38 (m, 2 H), 7.30 (s, 1 H), 7.08~7.05 (m, 2 H), 7.02~7.01 (m, 3 H), 6.94(s, 1 H), 2.61~2.56(m, 2 H), 2.52(s, 3 H), 1.57~1.50 (m, 2 H), minor *cis*-isomer,  $\delta$  7.97~7.95 (m, 1 H), 7.80~7.789 (m, 1 H), 7.48~7.46 (m, 2 H), 7.34~7.31 (m, 1 H), 7.22~7.19 (m, 1 H), 2.69 (s, 1 H), the remaining peaks are overlapped with those of the major *trans*-isomer;  $^{13}\text{C}$  NMR (100MHZ,  $\text{CDCl}_3$ ): major *trans*-isomer; 138.3, 135.7, 133.4, 133.3, 131.1, 128.9, 128.6, 128.0, 127.6, 125.6, 125.5, 125.3, 124.8, 123.8, 24.5, 24.4, 19.1, 11.6; HRMS calcd for  $\text{C}_{20}\text{H}_{18}$ : 258.1409; found 258.1410.

**Spectral data for 1-(2-Isopropenyl-phenyl)-hept-2-ynyl-1-ol (4)**

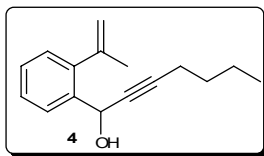

IR (neat,  $\text{cm}^{-1}$ ): 3645 (m), 2192 (w), 1622 (w);  $^1\text{H}$  NMR (400 MHz,  $\text{CDCl}_3$ ):  $\delta$  7.74 (d,  $J = 7.2$  Hz, 1 H), 7.31~7.25 (m, 2 H), 7.14 (d,  $J = 8.8$  Hz, 1 H), 5.66 (s, 1 H), 5.27 (s, 1 H), 4.96 (s, 1 H), 2.23 (t,  $J = 7.2$  Hz, 2 H), 2.03 (s, 3 H), 1.52~1.40 (m, 2 H), 1.39~1.25 (m, 2 H), 0.90 (t,  $J = 7.2$  Hz, 3 H);  $^{13}\text{C}$  NMR (100 MHz,  $\text{CDCl}_3$ ):  $\delta$  144.4, 142.3, 138.2, 127.7 (x2), 127.2, 127.0, 115.8, 86.7, 80.9, 61.6, 30.5, 25.7, 21.8, 18.4, 13.4; HRMS calcd for  $\text{C}_{16}\text{H}_{20}\text{O}$ : 228.1514; found 228.1510.

**Spectral data for 1-methyl-3-(pent-1-enyl) naphthalene (5):**

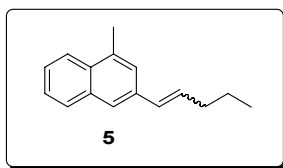

IR (neat,  $\text{cm}^{-1}$ ): 1605 (m);  $^1\text{H}$  NMR (600 MHz,  $\text{CDCl}_3$ ): (*trans/cis* = 1.1), *trans*-isomer,  $\delta$  7.92~7.90 (m, 1 H), 7.77~7.75 (m, 1 H), 7.52 (s, 1 H), 7.47~7.44 (m, 2 H), 7.43 (s, 1 H), 6.50~6.48 (m, 1 H), 6.34 (dt,  $J = 15.8, 7.0$  Hz, 1 H), 2.67 (s, 3 H), 2.39 (dq,  $J = 7.0, 1.3$  Hz, 2 H), 1.55~1.47 (m, 2 H), 0.97 (t,  $J = 7.3$  Hz, 3 H), *cis* isomer  $\delta$  7.94~7.93 (m, 1 H), 7.80~7.79 (m, 1 H), 7.57 (s, 1 H), 7.43~7.41 (m, 3 H), 5.72 (dt,  $J = 11.6, 7.2$  Hz, 1 H), 0.94 (t,  $J = 7.4$  Hz, 3 H), the remaining peaks are overlapped with those of the *trans* isomer;  $^{13}\text{C}$  NMR (150 MHz,  $\text{CDCl}_3$ ):  $\delta$  (*cis* and *trans* mixture) 135.0, 134.9, 134.2, 133.9, 133.8, 133.5, 133.3, 131.9, 131.4, 131.1, 130.0, 129.0, 128.5, 128.4, 128.0, 125.8, 125.7, 125.6, 125.5, 125.2, 124.2, 123.9, 123.8 (two CH signals for two isomers), 35.2, 30.8, 23.2, 22.6, 19.4, 19.3, 13.8, 13.7; HRMS calcd for  $\text{C}_{16}\text{H}_{18}$ : 210.1409; found 210.1410.

**Spectral data for 1-2-(Isopropenyl-phenyl)-3-phenyl-prop-2-ynyl-1-ol (6)**

# Supplementary Material (ESI) for Chemical Communications  
# This journal is (c) The Royal Society of Chemistry 2007

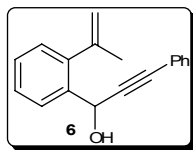

IR (neat,  $\text{cm}^{-1}$ ): 3650 (m), 2228 (m), 1640 (w);  $^1\text{H}$  NMR (400 MHz,  $\text{CDCl}_3$ ):  $\delta$  7.82 (d,  $J = 7.6$  Hz, 1 H), 7.44~7.42 (m, 2 H), 7.41~7.28 (m, 5 H), 7.19 (d,  $J = 8.0$  Hz, 1 H), 5.90 (s, 1 H), 5.30 (s, 1H), 5.01 (s, 1 H), 2.13 (s, 3 H);  $^{13}\text{C}$  NMR (100 MHz,  $\text{CDCl}_3$ ):  $\delta$  144.0, 142.5, 137.5(x2), 131.5, 128.3(x2), 128.2, 128.1, 128.0, 127.9, 127.2, 122.5, 116.1, 89.7, 86.0, 62.0, 25.3; HRMS calcd for  $\text{C}_{18}\text{H}_{16}\text{O}$ : 248.1201; found 248.1198.

**Spectral data for 4-Hydroxy-4-(2-isopropenyl-phenyl)-but-ynic acid methyl ester (7)**

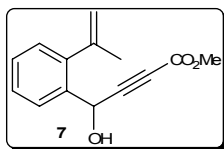

IR (neat,  $\text{cm}^{-1}$ ): 3665 (m), 2216 (w), 1740 (s), 1626 (w);  $^1\text{H}$  NMR (400 MHz,  $\text{CDCl}_3$ ):  $\delta$  7.66 (d,  $J = 9.2$  Hz, 1 H), 7.32~7.27 (m, 2 H), 7.15 (d,  $J = 9.2$  Hz, 1 H), 5.77 (s, 1 H), 5.27 (s, 1 H), 4.93 (s, 1 H), 3.74 (s, 3 H), 2.60 (s, 3 H);  $^{13}\text{C}$  NMR (100 MHz,  $\text{CDCl}_3$ ):  $\delta$  153.8, 143.6, 142.5, 135.7, 128.4, 128.1, 127.8, 127.3, 116.4, 88.0, 74.0, 60.9, 52.6, 25.5; HRMS Calculated for  $\text{C}_{14}\text{H}_{14}\text{O}_3$ : 230.0943; found 230.0940.

**Spectral data for 1-(2-prop-1-en-2-yl)phenyl-3-(thiophen-2-yl)prop-2-yn-1-ol (8):**

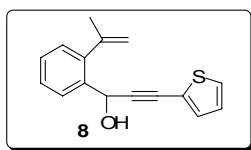

IR (neat,  $\text{cm}^{-1}$ ): 3652 (m), 2235 (w), 1643 (w);  $^1\text{H}$  NMR (400 MHz,  $\text{CDCl}_3$ ):  $\delta$  7.80 (dd,  $J = 7.4, 1.4$  Hz, 1 H), 7.36~7.28 (m, 2 H), 7.23 ~ 7.17 (m, 3 H), 6.95 (dd,  $J = 5.00, 3.8$  Hz, 1 H), 5.91 (s, 1 H), 5.30 (s, 1 H), 5.01 (s, 1 H), 2.13 (s, 3 H);  $^{13}\text{C}$  NMR (100 MHz,  $\text{CDCl}_3$ ):  $\delta$  144.0, 142.5, 137.2, 132.2, 128.1, 128.0, 127.5, 127.3, 127.2, 126.8, 122.4, 116.2, 93.5, 79.4, 62.2, 25.4; HRMS calcd for  $\text{C}_{16}\text{H}_{14}\text{OS}$ : 254.0765; found 254.0767.

**Spectral data for 3-(furan-2-yl)-1-(2-prop-1-en-2-yl)phenyl-prop-2-yn-1-ol (9):**

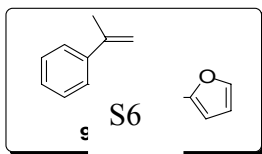

IR (neat,  $\text{cm}^{-1}$ ): 3647 (m), 2238 (w), 1648 (w);  $^1\text{H}$  NMR (400 MHz,  $\text{CDCl}_3$ ):  $\delta$  7.76 (d,  $J = 7.5$  Hz, 1 H), 7.35~7.29 (m, 3 H), 7.16 (dd,  $J = 7.5, 1.4$  Hz, 1 H), 6.57 (d,  $J = 3.3$  Hz, 1 H), 6.35 (dd,  $J = 3.3, 1.8$ , 1 H), 5.90 (s, 1 H), 5.28 (s, 1 H), 4.98 (s, 1 H), 2.10 (s, 3 H);  $^{13}\text{C}$  NMR (100 MHz,  $\text{CDCl}_3$ ):  $\delta$  143.8, 143.5, 142.4, 136.9, 136.4, 128.1, 127.8, 127.5, 127.2, 116.2, 115.4, 110.7, 94.0, 76.2, 62.0, 25.3; HRMS calcd for  $\text{C}_{16}\text{H}_{14}\text{O}_2$ : 238.0994; found 238.0996.

**Spectral data for 1-[2-(Phenyl-vinyl)-phenyl-prop-2-ynyl-1-ol (10)**

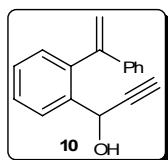

IR (neat,  $\text{cm}^{-1}$ ): 3665 (m), 3312 (s), 2234(w), 1622 (w);  $^1\text{H}$  NMR (400 MHz,  $\text{CDCl}_3$ ):  $\delta$  7.84 (d,  $J = 7.6$  Hz, 1 H), 7.44 (t,  $J = 7.6$  Hz, 1 H), 7.34 (t,  $J = 7.6$  Hz, 1 H), 7.30~7.28 (m, 5 H), 7.22 (d,  $J = 7.6$  Hz, 1 H), 5.88 (s, 1 H), 5.57 (s, 1 H), 5.46 (s, 1 H), 2.53 (s, 1 H);  $^{13}\text{C}$  NMR (100 MHz,  $\text{CDCl}_3$ ):  $\delta$  146.9, 140.1, 139.9, 138.3, 130.3, 128.3, 128.2 (x2), 128.1, 127.8, 127.1, 126.5 (x2), 116.3, 83.9, 74.0, 61.1; HRMS calcd for  $\text{C}_{17}\text{H}_{14}\text{O}$ : 234.1045, found 234.1041.

**Spectral data for 1-(4-Fluoro-2-isopropenyl-phenyl)-prop-2-ynyl-1-ol (11)**

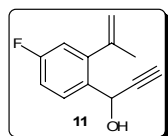

IR (neat,  $\text{cm}^{-1}$ ): 3662(m), 3305(s), 2224(w), 1612(w);  $^1\text{H}$  NMR (400 MHz,  $\text{CDCl}_3$ ):  $\delta$  7.69 (dd,  $J = 14.4, 5.6$  Hz, 1 H), 6.96 (t,  $J = 6.0$  Hz, 1 H), 6.82 (dd,  $J = 9.6, 2.4$  Hz, 1 H),

# Supplementary Material (ESI) for Chemical Communications  
# This journal is (c) The Royal Society of Chemistry 2007

5.58 (s, 1 H), 5.24 (s, 1 H), 4.96 (s, 1 H), 2.56 (s, 1 H), 2.03 (s, 3 H);  $^{13}\text{C}$  NMR (100 MHz,  $\text{CDCl}_3$ ):  $\delta$  162.1(d,  $J_{\text{CF}} = 245.7$  Hz), 144.7, 142.8, 133.1, 129.2 (d,  $J_{\text{CF}} = 8.4$  Hz), 116.7 (x2), 114.4 (d,  $J_{\text{CF}} = 30.6$  Hz), 84.3, 74.3, 60.6, 24.9; HRMS calcd for  $\text{C}_{12}\text{H}_{11}\text{FO}$ : 190.0794, found 190.0790.

**Spectral data for 1-(2-Isopropenyl-4-methoxy-phenyl)-prop-2-ynyl-1-ol (12)**

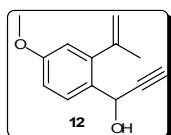

IR (neat,  $\text{cm}^{-1}$ ): 3663 (m), 3315 (s), 2234 (m), 1622 (w), 1239 (s), 1034 (s);  $^1\text{H}$  NMR (400 MHz,  $\text{CDCl}_3$ ):  $\delta$  7.65 (d,  $J = 8.8$  Hz, 1 H), 6.81 (d,  $J = 8.8$  Hz, 1 H), 6.48 (s, 1 H), 5.66 (s, 1 H), 5.27 (s, 1 H), 4.96 (s, 1 H), 3.75 (s, 3 H), 2.56 (s, 1 H), 2.05 (s, 3 H);  $^{13}\text{C}$  NMR (100 MHz,  $\text{CDCl}_3$ ):  $\delta$  158.9, 143.9, 143.7, 129.6, 128.5, 115.9, 113.4 (x2), 84.7, 73.7, 60.5, 55.0, 25.0; HRMS calcd for  $\text{C}_{13}\text{H}_{14}\text{O}_2$ : 202.0994, found 202.0990.

**Spectral data for 1-(5-Fluoro-2-isopropenyl-phenyl)-prop-2-ynyl-1-ol (13)**

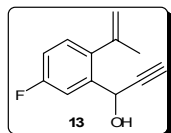

IR (neat,  $\text{cm}^{-1}$ ): 3637(m), 3308(s), 2241( w),1619(w);  $^1\text{H}$  NMR (400 MHz,  $\text{CDCl}_3$ ):  $\delta$  7.43 (dd,  $J = 10.0, 3.2$  Hz, 1 H), 7.10 (dd,  $J = 8.4, 6.0$  Hz, 1 H), 6.96 (t,  $J = 8.4$  Hz, 1 H), 5.60 (s, 1 H), 5.25 (s, 1 H), 4.92 (s, 1 H), 2.64 (s, 1 H), 2.04 (s, 3 H);  $^{13}\text{C}$  NMR (100 MHz,  $\text{CDCl}_3$ ):  $\delta$  161.8 (d,  $J_{\text{CF}} = 244.2$  Hz), 143.0, 139.2 (d,  $J_{\text{CF}} = 24.4$  Hz), 138.8 (d,  $J_{\text{CF}} = 93.3$  Hz), 116.7 (x2), 115.2(d,  $J_{\text{CF}} = 82.4$  Hz), 113.8(d,  $J_{\text{CF}} = 88.8$  Hz), 83.9, 74.6, 60.9, 25.0; HRMS calcd for  $\text{C}_{12}\text{H}_{11}\text{FO}$ : 190.0794, found 190.0791.

**Spectral data for 1-(2-Isopropenyl-5-methoxy-phenyl)-prop-2-ynyl-1-ol (14)**

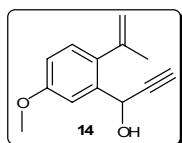



# Supplementary Material (ESI) for Chemical Communications  
# This journal is (c) The Royal Society of Chemistry 2007

IR (neat,  $\text{cm}^{-1}$ ): 3659(m), 3318(s), 2241(m), 1618(w), 1233(s), 1038(s);  $^1\text{H}$  NMR (300 MHz,  $\text{CDCl}_3$ ):  $\delta$  7.26 (dd,  $J = 13.5, 2.4$  Hz, 1 H), 7.26 (d,  $J = 8.5$  Hz, 1 H), 6.83 (dd,  $J = 13.5, 2.4$  Hz, 1 H), 5.66 (s, 1 H), 5.24 (s, 1 H), 4.92 (s, 1 H), 3.82 (s, 3 H), 2.60 (s, 3 H), 2.05 (s, 1 H);  $^{13}\text{C}$  NMR (100 MHz,  $\text{CDCl}_3$ ):  $\delta$  158.6, 143.4, 129.0, 116.0, 114.1, 112.8, 112.3, 111.6, 84.5, 74.0, 61.0, 55.1, 25.3; HRMS calcd for  $\text{C}_{13}\text{H}_{14}\text{O}_2$ : 202.0994, found 202.0990.

**Spectral data for 1-(6-Isopropenyl-benzo[1,3]dioxol-5-yl)-prop-2-ynyl-1-ol (15).**

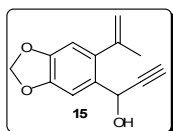

IR (neat,  $\text{cm}^{-1}$ ): 3646 (m), 3325 (s), 2208 (w), 1612 (w);  $^1\text{H}$  NMR (400 MHz,  $\text{CDCl}_3$ ):  $\delta$  7.20 (s, 1 H), 6.59 (s, 1 H), 5.92 (s, 2 H), 5.59 (s, 1 H), 5.22 (s, 1 H), 4.93 (s, 1 H), 2.58 (s, 1 H), 2.02 (s, 3 H);  $^{13}\text{C}$  NMR (100 MHz,  $\text{CDCl}_3$ ):  $\delta$  147.4, 146.9, 143.5, 136.7, 130.6, 116.4, 107.7, 107.1, 101.2, 84.4, 74.1, 61.1, 25.3; HRMS calcd for  $\text{C}_{13}\text{H}_{12}\text{O}_3$ : 216.0786, found 216.0782.

**Spectral data for (4-Methyl-naphthalen-2-yl)-phenyl-methanone (16)**

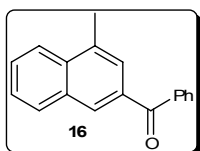

IR (neat,  $\text{cm}^{-1}$ ): 1645(s);  $^1\text{H}$  NMR (400 MHz,  $\text{CDCl}_3$ ):  $\delta$  8.09 (s, 1 H), 8.04 (d,  $J = 8.4$  Hz, 1 H), 7.90 (d,  $J = 8.0$  Hz, 1 H), 7.85 (d,  $J = 9.6$  Hz, 1 H), 7.80 (s, 1 H), 7.64~7.58 (m, 3 H), 7.48~7.43 (m, 3 H), 2.74 (s, 3 H);  $^{13}\text{C}$  NMR (100 MHz,  $\text{CDCl}_3$ ):  $\delta$  196.6, 137.7, 134.7, 134.3, 134.1, 131.9, 130.2 (x2), 129.7, 129.1, 128.4 (x2), 127.9, 126.5, 126.1, 125.7, 123.8, 19.0; HRMS calcd for  $\text{C}_{18}\text{H}_{14}\text{O}$ : 246.1045, found 246.1042.

**Spectral data for (4-Methyl-naphthalen-2-yl)-oxo-acetic acidmethyl ester (17)**

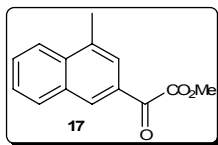

IR (neat,  $\text{cm}^{-1}$ ): 1683 (s), 1135 (s);  $^1\text{H}$  NMR (400 MHz,  $\text{CDCl}_3$ ):  $\delta$  8.39 (s, 1 H), 8.01 (d,  $J = 8.4$  Hz, 1 H), 7.96 (d,  $J = 8.0$  Hz, 1 H), 7.86 (s, 1 H), 7.67 (t,  $J = 8.4$  Hz, 1H), 7.56 (t,  $J = 8.0$  Hz, 1 H), 4.01 (s, 3 H), 2.71 (s, 3 H);  $^{13}\text{C}$  NMR (100 MHz,  $\text{CDCl}_3$ ):  $\delta$  186.1, 164.2, 135.8, 132.4, 132.3, 130.7, 129.5, 129.3, 126.8 (x2), 124.2, 124.0, 52.7, 19.3; HRMS calcd for  $\text{C}_{14}\text{H}_{12}\text{O}_3$ : 228.0786, found 228.0783.

**Spectral data for (1-methylnaphthalen-3-yl)(thiophen-2-yl)methanone (18).**

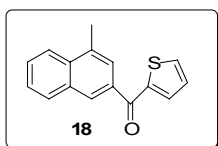

IR (neat,  $\text{cm}^{-1}$ ): 1688 (s);  $^1\text{H}$  NMR (400 MHz,  $\text{CDCl}_3$ ):  $\delta$  8.23 (s, 1 H), 8.04 (d,  $J = 8.4$  Hz, 1 H), 7.94 (d,  $J = 8.1$  Hz, 1 H), 7.77 (s, 1 H), 7.73~7.71 (m, 2 H), 7.65~7.62 (m, 1 H), 7.55 (t,  $J = 8.1$  Hz, 1 H), 7.18 (dd,  $J = 4.9, 3.8$  Hz, 1 H), 2.75 (s, 3 H);  $^{13}\text{C}$  NMR (150 MHz,  $\text{CDCl}_3$ ):  $\delta$  188.3, 143.8, 135.2, 135.0, 134.7, 134.5, 134.0, 132.4, 130.0, 129.1, 128.0, 127.9, 126.5, 125.6, 124.2, 19.4; HRMS calcd for  $\text{C}_{16}\text{H}_{12}\text{OS}$ : 252.0609; found 252.0607.

**Spectral data for (furan-2-yl)(1-methylnaphthalen-3-yl)methanone (19):**

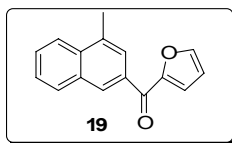

IR (neat,  $\text{cm}^{-1}$ ): 1684(s);  $^1\text{H}$  NMR (600 MHz,  $\text{CDCl}_3$ ):  $\delta$  8.37 (s, 1 H), 8.03 (d,  $J = 8.2$  Hz, 1 H), 7.96 (d,  $J = 8.2$  Hz, 1 H), 7.84 (s, 1 H), 7.73 (d,  $J = 3.1$ Hz, 1 H), 7.64 (t,  $J = 8.2$ Hz, 1 H), 7.55 (t,  $J = 8.2$  Hz, 1 H), 7.28 (d,  $J = 3.2$  Hz, 1 H), 6.62~6.60 (m, 1 H), 2.74 (s, 3 H);  $^{13}\text{C}$  NMR (150 MHz,  $\text{CDCl}_3$ )  $\delta$  182.4, 152.3, 146.9, 135.0, 134.5, 134.0, 132.0, 130.0, 129.3, 128.1, 126.3, 125.3, 124.0, 120.0, 112.0, 19.2; HRMS calcd for  $\text{C}_{16}\text{H}_{12}\text{O}_2$ : 236.0807; found 236.0806.

**Spectral data for (4-Phenyl-naphthalen-2-carbaldehyde (20)**

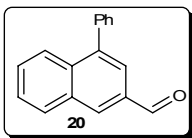

IR (neat,  $\text{cm}^{-1}$ ): 2857 (w), 2746 (w), 1678 (s);  $^1\text{H}$  NMR (400 MHz,  $\text{CDCl}_3$ ):  $\delta$  10.1 (s, 1 H), 8.30 (s, 1 H), 8.05 (d,  $J = 6.8$  Hz, 1 H), 7.94 (d,  $J = 9.6$  Hz, 1 H), 7.89 (s, 1 H), 7.59-7.49 (m, 1 H), 7.48-7.43 (m, 6 H);  $^{13}\text{C}$  NMR (100 MHz,  $\text{CDCl}_3$ ):  $\delta$  192.1, 141.5, 139.5, 134.7, 133.7, 133.1, 133.1, 129.8 (x3), 129.1, 128.4, 127.7 (x3), 126.9, 123.6; HRMS calcd for  $\text{C}_{17}\text{H}_{12}\text{O}$ : 232.0888; found 232.0886.

**Spectral data for 6-Fluoro-4-methyl-naphthalene-2-carbaldehyde (21)**

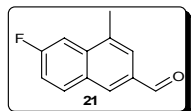

IR (neat,  $\text{cm}^{-1}$ ): 2853 (w), 2740 (w), 1685 (s);  $^1\text{H}$  NMR (400 MHz,  $\text{CDCl}_3$ ):  $\delta$  10.0 (s, 1 H), 8.13 (s, 1 H), 7.96 (dd,  $J = 8.8, 6.0$  Hz, 1 H), 7.70 (s, 1 H), 7.57 (d,  $J = 10.4$  Hz, 1 H), 6.82 (t,  $J = 8.8$  Hz, 1 H), 2.63 (s, 3 H);  $^{13}\text{C}$  NMR (100 MHz,  $\text{CDCl}_3$ ):  $\delta$  191.9, 162.5 (d,  $J_{\text{CF}} = 250.0$  Hz), 137.2, 135.2, 133.2, 132.8(x2), 129.6, 123.8, 116.9 (d,  $J_{\text{CF}} = 25.2$  Hz), 108.5 (d,  $J_{\text{CF}} = 21.4$  Hz), 19.3; HRMS Calculated for  $\text{C}_{12}\text{H}_9\text{FO}$ : 188.0637; found 188.0634.

**Spectral data for 6-Methoxy-4-methyl-naphthalene-2-carbaldehyde (22)**

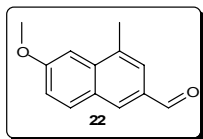

IR (neat,  $\text{cm}^{-1}$ ): 2855 (w), 2734 (w), 1682 (s), 1246 (s), 1033 (s);  $^1\text{H}$  NMR (400 MHz  $\text{CDCl}_3$ ):  $\delta$  10.03 (s, 1 H), 8.10 (s, 1 H), 7.88 (d,  $J = 9.2$  Hz, 1 H), 7.76 (s, 1 H), 7.22 (d,  $J = 7.2$  Hz, 2 H), 3.96 (s, 3 H), 2.66 (s, 3 H);  $^{13}\text{C}$  NMR (100 MHz,  $\text{CDCl}_3$ ):  $\delta$  192.1, 160.2, 137.5, 134.1, 133.0, 131.8 (x2), 127.9, 123.6, 118.9, 103.2, 55.3, 19.5; HRMS calcd for  $\text{C}_{13}\text{H}_{12}\text{O}_2$ : 200.0837; found 200.0834.

**Spectral data for 7-Fluoro-4-methyl-naphthalene-2-carbaldehyde (23)**

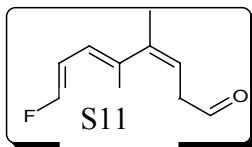

IR (neat,  $\text{cm}^{-1}$ ): 2848 (w), 2737 (w), 1685 (s);  $^1\text{H}$  NMR (300 MHz,  $\text{CDCl}_3$ ):  $\delta$  10.09 (s, 1 H), 8.10 (s, 1 H), 8.01 (dd,  $J = 9.3, 5.4$  Hz, 1 H), 7.72 (s, 1 H), 7.59 (dd,  $J = 9.8, 2.6$  Hz, 1 H), 7.45 (t,  $J = 8.7$  Hz, 1 H), 2.70 (s, 3 H);  $^{13}\text{C}$  NMR (100 MHz,  $\text{CDCl}_3$ ):  $\delta$  192.2, 160.8 (d,  $J_{\text{CF}} = 246.4$  Hz), 135.9, 134.4, 132.6, 132.1, 126.9, 122.2, 118.7 (d,  $J_{\text{CF}} = 24.5$  Hz), 116.7, 113.5 (d,  $J_{\text{CF}} = 19.9$  Hz), 19.3; HRMS calcd for  $\text{C}_{12}\text{H}_9\text{FO}$ : 188.0637; found 188.0640.

**Spectral data for 7-Methoxy-4-methyl-naphthalene-2-carbaldehyde (24)**

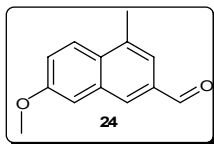

IR (neat,  $\text{cm}^{-1}$ ): 2851 (w), 2729 (w), 1686 (s), 1248 (s), 1034 (s);  $^1\text{H}$  NMR (400 MHz,  $\text{CDCl}_3$ ):  $\delta$  10.0 (s, 1 H), 8.06 (s, 1 H), 7.91 (d,  $J = 9.2$  Hz, 1 H), 7.62 (s, 1 H), 7.31~7.25 (m, 2 H), 3.93 (s, 3 H), 2.61 (s, 3 H);  $^{13}\text{C}$  NMR (100 MHz,  $\text{CDCl}_3$ ):  $\delta$  192.6, 158.0, 135.7, 134.2, 134.1, 131.8, 131.2, 125.9, 121.3, 121.1, 107.9, 55.4, 19.3; HRMS calcd for  $\text{C}_{13}\text{H}_{12}\text{O}_2$ : 200.0837, found 200.0834.

**Spectral data for 8-methyl-naphtho[2,3-d][1,3]-dioxole-6-carbaldehyde (25)**

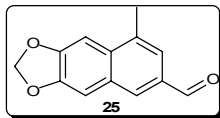

IR (neat,  $\text{cm}^{-1}$ ): 2836 (w), 2727 (w), 1692 (s);  $^1\text{H}$  NMR ( $\text{CDCl}_3$ , 300 MHz):  $\delta$  10.03 (s, 1 H), 8.0 (s, 1 H), 7.65 (s, 1 H), 7.30 (s, 1 H), 7.29 (s, 1 H), 6.10 (s, 2 H), 2.62 (s, 3 H);  $^{13}\text{C}$  NMR (100 MHz,  $\text{CDCl}_3$ ):  $\delta$  192.3, 150.2, 147.9, 136.6, 134.4, 130.7, 122.5, 116.4, 105.6, 101.1, 101.0, 90.0, 19.7; HRMS calcd for  $\text{C}_{13}\text{H}_{10}\text{O}_3$ : 214.0630, found 214.0626.

**Spectral data for 1-(2-isopropenyl-phenyl)-but-2-yn-1-ol (26)**

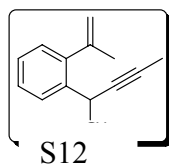

IR (neat, cm<sup>-1</sup>): 3639 (m), 2236 (m), 1652 (w); <sup>1</sup>H NMR (400 MHz, CDCl<sub>3</sub>): δ 7.72 (d, *J* = 7.6 Hz, 1 H), 7.32-7.23 (m, 2 H), 7.12 (d, *J* = 7.6 Hz, 1 H), 5.62 (s, 1 H), 5.24 (s, 1 H), 4.93 (s, 1 H), 2.08 (s, 3 H), 1.85 (s, 3 H); <sup>13</sup>C NMR (100 MHz, CDCl<sub>3</sub>): δ 144.0, 142.2, 138.1, 127.7 (x2), 127.3, 126.9, 115.8, 82.3, 80.0, 61.5, 25.2, 3.5; HRMS calcd for C<sub>13</sub>H<sub>14</sub>O: 186.1045, Found 186.1041.

**Spectral data for 1-(5-methoxy-2-(prop-1-en-2-yl)phenyl)undec-2-yn-1-ol (27):**

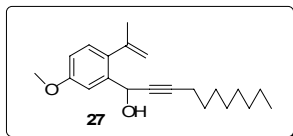

IR (neat, cm<sup>-1</sup>): 3633 (m), 2152 (w), 1632 (w), 1235 (s), 1035 (s); <sup>1</sup>H NMR (400 MHz, CDCl<sub>3</sub>): δ 7.28 (d, *J* = 2.8 Hz, 1 H), 7.03 (d, *J* = 8.4 Hz, 1 H), 6.79 (dd, *J* = 8.4, 2.8 Hz, 1 H), 5.61 (s, 1 H), 5.21 (s, 1 H), 4.91 (s, 1 H), 3.78 (s, 3 H), 2.20 (t, *J* = 7.0 Hz, 2 H), 2.04 (s, 3 H), 1.51~1.24 (m, 12 H), 0.86 (t, *J* = 5.6 Hz, 3 H); <sup>13</sup>C NMR (100 MHz, CDCl<sub>3</sub>): δ 158.5, 143.7, 139.5, 134.7, 128.8, 115.8, 113.9, 111.6, 86.8, 80.8, 61.6, 55.0, 31.7, 29.0, 28.9, 28.8, 28.4, 25.3, 22.5, 18.7, 13.9 HRMS calcd for C<sub>21</sub>H<sub>30</sub>O<sub>2</sub>: 314.2246; found 314.2249.

**Spectral data for 1-(4-methoxy-2-(prop-1-en-2-yl)phenyl)undec-2-yn-1-ol (28):**

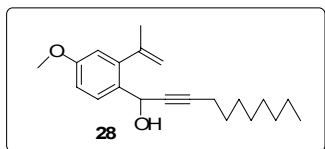

IR (neat, cm<sup>-1</sup>): 3638 (m), 2155 (w), 1635(w), 1231(s) 1041 (s); <sup>1</sup>H NMR (400 MHz, CDCl<sub>3</sub>): δ 7.67 (d, *J* = 8.4 Hz, 1 H), 6.84 (dd, *J*=8.4, 2.4, 1 H), 6.67 (d, *J* = 2.4 Hz, 1 H), 5.59 (s, 1 H), 5.25 (s, 1 H), 4.96 (s, 1 H), 3.79 (s, 3 H), 2.24 (t, *J* = 7.0 Hz, 2 H), 2.09 (s, 3 H), 1.50 (quin, *J* = 7.0 Hz, 2 H), 1.38~1.27(m, 10 H), 0.88 (t, *J* = 6.8 Hz, 3 H); <sup>13</sup>C

# Supplementary Material (ESI) for Chemical Communications  
# This journal is (c) The Royal Society of Chemistry 2007

NMR (100MHz, CDCl<sub>3</sub>):  $\delta$  158.9, 144.1, 143.9, 130.7, 128.6, 115.9, 113.0, 112.9, 86.8, 80.9, 61.4, 55.2, 31.7, 29.1, 29.0, 28.8, 28.5, 25.2, 22.6, 18.8, 14.0; HRMS calcd for C<sub>21</sub>H<sub>30</sub>O<sub>2</sub>: 314.2246; found 314.2248.

**1-(5-(prop-1-en-2-yl)benzo[d][1,3]dioxol-6-yl)undecundec-2-yn-1-ol (29):**

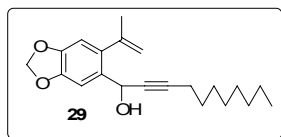

IR (neat, cm<sup>-1</sup>): 3642 (m), 2141 (m), 1638 (w); <sup>1</sup>H NMR (400 MHz, CDCl<sub>3</sub>):  $\delta$  7.21 (1 H), 6.59 (s, 1 H), 5.93 (s, 2 H), 5.56 (s, 1 H), 5.21 (s, 1 H), 4.92 (s, 1 H), 2.20 (t, *J* = 7.2 Hz, 2 H), 2.02 (s, 3 H), 1.48 (quin, *J* = 7.2 Hz, 2H), 1.34~1.25 (m, 10 H), 0.85 (t, *J* = 5.8 Hz, 3 H); <sup>13</sup>C NMR (100 MHz, CDCl<sub>3</sub>):  $\delta$  146.9, 146.6, 143.7, 136.2, 132.0, 116.0, 107.5, 107.2, 100.9, 86.6, 80.9, 61.3, 31.7, 29.1, 28.9, 28.8, 28.5, 25.2, 22.5, 18.6, 13.9; HRMS calcd for C<sub>21</sub>H<sub>28</sub>O<sub>3</sub>: 328.2038; found 328.2039.

**Spectral data for 1-(5-Fluoro-2-isopropenyl-pheynl)-undec-2-ynyl-1-ol (30)**

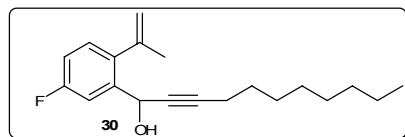

IR (neat, cm<sup>-1</sup>): 3647 (m), 2158 (m), 1656 (w); <sup>1</sup>H NMR (400 MHz, CDCl<sub>3</sub>):  $\delta$  7.43 (dd, *J* = 10.0, 2.4 Hz, 1 H), 7.09 (dd, *J* = 8.4, 5.6 Hz, 1 H), 6.94 (t, *J* = 8.4 Hz, 1 H), 5.61 (s, 1 H), 5.26 (s, 1 H), 4.92 (s, 1 H), 2.19 (t, *J* = 7.2 Hz, 2 H), 2.05 (s, 3 H), 1.51~1.45 (m, 2 H), 1.35~1.32 (m, 2 H), 1.29~1.22 (m, 8 H), 0.85 (t, *J* = 7.2 Hz, 3 H); <sup>13</sup>C NMR (100 MHz, CDCl<sub>3</sub>):  $\delta$  161.8 (d, *J*<sub>CF</sub> = 243.3 Hz), 143.2, 140.5, 138.1, 129.4, 116.3, 114.7 (d, *J*<sub>CF</sub> = 20.6 Hz), 113.7 (d, *J*<sub>CF</sub> = 22.2 Hz), 87.3, 80.3, 62.6, 31.7, 29.0, 28.9, 28.5, 27.7, 25.2, 22.5, 18.6, 13.9; HRMS calcd for C<sub>20</sub>H<sub>27</sub>FO: 302.2046, Found 302.2041.

**Spectral data for 1-(4-methyl-naphthalen-2-yl)-pentan-1-one (31)**

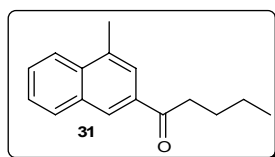

# Supplementary Material (ESI) for Chemical Communications  
# This journal is (c) The Royal Society of Chemistry 2007

IR (neat,  $\text{cm}^{-1}$ ): 1684 (s);  $^1\text{H}$  NMR (400 MHz,  $\text{CDCl}_3$ ):  $\delta$  8.29 (s, 1 H), 7.98 (d,  $J = 8.4$  Hz, 1 H), 7.94 (d,  $J = 8.0$  Hz, 1 H), 7.85 (s, 1 H), 7.60 (t,  $J = 8.0$  Hz, 1 H), 7.52 (t,  $J = 8.0$  Hz, 1 H), 3.06 (t,  $J = 7.6$  Hz, 2 H), 2.7 (s, 3 H), 1.79-1.74 (m, 2 H), 1.46~1.40 (m, 2H), 0.96 (t,  $J = 7.2$  Hz, 3 H);  $^{13}\text{C}$  NMR (100 MHz,  $\text{CDCl}_3$ ):  $\delta$  200.7, 134.9, 134.7, 134.0, 132.6, 130.1, 128.1, 126.7, 124.2, 124.0, 123.9, 39.2, 26.7, 22.4, 19.3, 13.9; HRMS calcd for  $\text{C}_{16}\text{H}_{18}\text{O}$ : 226.1358, Found 226.1360.

**Spectral data for 1-(4-Methyl-naphthalene-2-yl)-ethanone (32)**

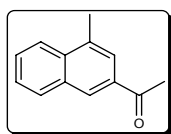

IR (neat,  $\text{cm}^{-1}$ ): 1691 (s);  $^1\text{H}$  NMR (400 MHz,  $\text{CDCl}_3$ ):  $\delta$  8.30 (s, 1 H), 7.99-7.94 (m, 2 H), 7.86 (s, 1 H), 7.62 (t,  $J = 8.4$  Hz, 1 H), 7.54 (t,  $J = 8.0$  Hz, 1 H), 2.69 (s, 6 H);  $^{13}\text{C}$  NMR (100 MHz,  $\text{CDCl}_3$ ):  $\delta$  198.3, 135.0, 134.9, 134.1, 132.6, 130.2, 128.8, 128.3, 126.4, 124.1 (x2), 26.5, 19.3; HRMS calcd for  $\text{C}_{13}\text{H}_{12}\text{O}$ : 184.0888, Found 184.0886.

**Spectral data for 1-(6-methoxy-1-methylnaphthalen-3-yl)nonane-1-one (33):**

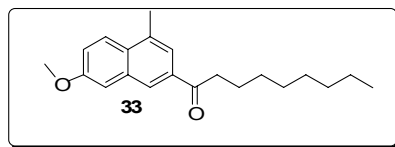

IR (neat,  $\text{cm}^{-1}$ ): 1682 (s), 1240 (s), 1044 (s);  $^1\text{H}$  NMR (400 MHz,  $\text{CDCl}_3$ ):  $\delta$  8.20 (s, 1 H), 7.89 (d,  $J = 9.2$  Hz, 1 H), 7.70 (s, 1 H), 7.27~7.26 (m, 2 H), 3.93 (s, 3 H), 3.04 (t,  $J = 7.4$  Hz, 2 H), 2.67 (s, 3 H), 1.75 (quin,  $J = 7.4$  Hz, 2 H), 1.39~1.23 (m, 10 H), 0.86 (t,  $J = 6.2$  Hz, 3 H);  $^{13}\text{C}$  NMR (150 MHz,  $\text{CDCl}_3$ ):  $\delta$  200.9, 157.8, 134.8, 134.6, 134.1, 130.2, 127.0, 125.6, 122.4, 120.6, 107.8, 55.3, 38.6, 31.8, 29.5, 29.4, 29.1, 24.6, 22.6, 19.4, 14.0; HRMS calcd for  $\text{C}_{21}\text{H}_{28}\text{O}_2$ : 312.2089; found 312.2090.

**Spectral data for 1-(5-methyl-naphtho[2,3-d][1-3]dioxo-7-yl) nonane-1-one (34):**

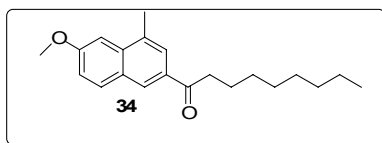

# Supplementary Material (ESI) for Chemical Communications  
# This journal is (c) The Royal Society of Chemistry 2007

IR (neat,  $\text{cm}^{-1}$ ): 1679 (s), 1237 (s), 1048(s);  $^1\text{H}$  NMR (600 MHz,  $\text{CDCl}_3$ ):  $\delta$  8.20 (s, 1 H), 7.84~7.82 (m, 2 H), 7.18~7.17 (m, 2 H), 3.94 (s, 3 H), 3.02 (t,  $J = 7.3$  Hz, 2 H), 2.64 (s, 3 H), 1.77~1.74 (m, 2 H), 1.39~1.24 (m, 10 H), 0.87 (t,  $J = 6.8$  Hz, 3 H);  $^{13}\text{C}$  NMR (150 MHz,  $\text{CDCl}_3$ ):  $\delta$  200.5, 159.6, 136.4, 133.3, 132.0, 131.7, 128.0, 127.8, 124.9, 118.7, 102.8, 55.3, 38.4, 31.8, 29.4 (2x $\text{CH}_2$ ), 29.1, 24.7, 22.6, 19.5, 14.0; HRMS calcd for  $\text{C}_{21}\text{H}_{28}\text{O}_2$ : 312.2089; found 312.2092.

**Spectral data for 1-(5-methyl-naphtho[2,3-*d*][1-3]dioxo-7-yl) nonane-1-one (35):**

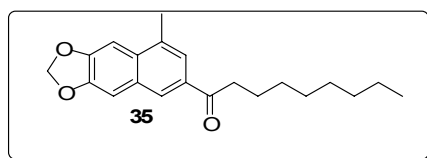

IR (neat,  $\text{cm}^{-1}$ ): 1684 (s), 1247 (s), 1238 (s);  $^1\text{H}$  NMR (400 MHz,  $\text{CDCl}_3$ ):  $\delta$  8.13 (s, 1 H), 7.72 (s, 1 H), 7.27 (s, 1 H), 7.20 (s, 1 H), 6.07(s, 2 H), 3.01 (t,  $J = 7.2$  Hz, 2 H), 2.60 (s, 3 H), 1.74 (quin,  $J = 7.2$  Hz, 2 H), 1.48~1.13 (m, 10 H), 0.88 (t,  $J = 6.0$  Hz, 3 H);  $^{13}\text{C}$  NMR (150 MHz,  $\text{CDCl}_3$ ):  $\delta$  200.6, 149.6, 147.8, 133.6, 132.8, 132.5, 129.7, 126.9, 123.5, 105.8, 101.4, 100.7, 38.5, 31.8, 29.4, 29.3, 29.1, 24.6, 22.6, 19.8, 14.0; HRMS calcd for  $\text{C}_{21}\text{H}_{26}\text{O}_3$ : 326.1882; found 326.1881.

**Spectral data for 1-(7-Fluoro-4-methyl-naphthalen-2-yl)-nonan-1-one (36)**

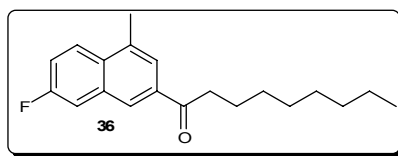

IR (neat,  $\text{cm}^{-1}$ ): 1688 (s);  $^1\text{H}$  NMR (400 MHz,  $\text{CDCl}_3$ ):  $\delta$  8.20 (s, 1 H), 7.96 (dd,  $J = 8.8$ , 5.2 Hz, 1 H), 7.78 (s, 1 H), 7.52 (dd,  $J = 6.8$ , 2.8 Hz, 1 H), 7.35 (t,  $J = 8.4$  Hz, 1 H), 3.03 (t,  $J = 7.2$  Hz, 2 H), 2.68 (s, 3 H), 1.79-1.71 (m, 2 H), 1.40-1.26 (m, 10 H), 0.86 (t,  $J = 6.8$  Hz, 3 H);  $^{13}\text{C}$  NMR (100 MHz,  $\text{CDCl}_3$ ):  $\delta$  200.5, 160.7 (d,  $J_{\text{CF}} = 244.9$  Hz), 135.2, 133.8, 131.7, 127.2, 126.6, 123.7, 118.1 (d,  $J_{\text{CF}} = 24.5$  Hz), 112.9 (d,  $J_{\text{CF}} = 20.6$  Hz), 38.6, 31.8, 29.4x2, 29.3, 29.1, 24.4, 22.6, 19.5, 14.0; HRMS Calculated for  $\text{C}_{20}\text{H}_{25}\text{FO}$ : 300.1889, Found 300.1885.



**Spectral data for 1-methyl-3-vinylnaphthalene (37):**

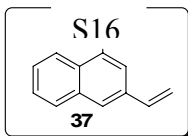

IR (neat,  $\text{cm}^{-1}$ ): 1656 (w) ;  $^1\text{H}$  NMR (400 MHz,  $\text{CDCl}_3$ ):  $\delta$  7.94 (d,  $J = 6.4$  Hz, 1 H), 7.80 (d,  $J = 6.4$  Hz, 1 H), 7.60 (s, 1 H), 7.47~7.44 (m, 3 H), 6.84 (dd,  $J = 17.6, 10.8$  Hz, 1 H), 5.85 (d,  $J = 17.6$  Hz, 1 H), 5.31 (d,  $J = 10.8$  Hz, 1 H), 2.66 (s, 3 H);  $^{13}\text{C}$  NMR (150 MHz,  $\text{CDCl}_3$ ) :  $\delta$  137.0, 134.5, 134.4, 133.7, 132.4, 128.6, 125.9, 125.7, 124.9, 124.0, 123.7, 113.8, 19.4; HRMS calcd for  $\text{C}_{13}\text{H}_{12}$ : 168.0939; found 168.0941.

**Spectral data for 6-methoxy-1-methyl-3-((E)-non-1-enyl)naphthalene (38):**

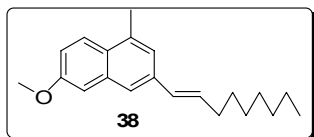

IR (neat,  $\text{cm}^{-1}$ ): 1671 (w), 1239 (s), 1046 (s);  $^1\text{H}$  NMR (400 MHz,  $\text{CDCl}_3$ ):  $\delta$  7.80 (d,  $J = 10.0$  Hz, 1 H), 7.47 (s, 1 H), 7.42 (s, 1 H), 7.12~7.07 (m, 2 H), 6.45 (d,  $J = 15.6$  Hz, 1 H), 6.31 (td,  $J = 15.6, 6.8$  Hz, 1 H), 3.9 (s, 3 H), 2.65 (s, 3 H), 2.23 (q,  $J = 6.8$  Hz, 2 H), 1.49~1.27 (m, 10 H), 0.87 (t,  $J = 6.8$  Hz, 3 H);  $^{13}\text{C}$  NMR (150 MHz,  $\text{CDCl}_3$ )  $\delta$  157.5, 135.6, 135.2, 134.2, 131.4, 130.0, 127.3, 125.4, 123.0, 122.2, 117.5, 106.5, 55.2, 33.2, 31.8, 29.5, 29.3 (2x $\text{CH}_2$ ), 22.7, 19.3, 14.1; HRMS calcd for  $\text{C}_{21}\text{H}_{28}\text{O}$ : 296.2140; found 296.2143.

**Spectral data for 7-methoxy-1-methyl-3-((E)-non-1-enyl)naphthalene (39):**

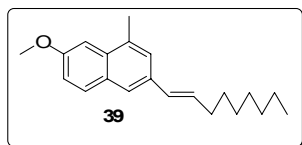

IR (neat,  $\text{cm}^{-1}$ ): 1678 (w), 1233 (s), 1042 (s);  $^1\text{H}$  NMR (400 MHz,  $\text{CDCl}_3$ ):  $\delta$  7.68 (d,  $J = 8.8$  Hz, 1 H), 7.47 (s, 1 H), 7.40 (s, 1 H), 7.16 (d,  $J = 2.0$  Hz, 1 H), 7.11 (d,  $J = 8.8$  Hz, 1 H), 6.46 (d,  $J = 16.0$  Hz, 1 H), 6.29 (td,  $J = 16.0, 6.8$  Hz, 1 H), 3.92 (s, 3 H), 2.62 (s, 3 H), 2.23 (q,  $J = 6.8$  Hz, 2 H), 1.48 (quin,  $J = 6.8$  Hz, 2 H), 1.34~1.28 (m, 8 H), 0.88 (t,  $J =$

# Supplementary Material (ESI) for Chemical Communications  
# This journal is (c) The Royal Society of Chemistry 2007

6.4 Hz, 3 H);  $^{13}\text{C}$  NMR (150 MHz,  $\text{CDCl}_3$ ): 157.4, 132.9 (x2), 132.8, 130.4, 129.9, 129.8, 129.2, 124.8, 123.6, 117.9, 103.0, 55.2, 33.2, 31.2, 29.5, 29.2 (x2), 22.7, 19.6, 14.1; HRMS calcd for  $\text{C}_{21}\text{H}_{28}\text{O}$ ; 296.2140; found 296.2144.

**Spectral data for 5-methyl-7-((*E*)-non-1-enyl)naphtha[2.3- $\alpha$ ][1,3]dioxole (40):**

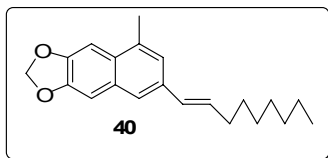

IR (neat,  $\text{cm}^{-1}$ ): 1673 (w), 1263 (s), 1242 (s);  $^1\text{H}$  NMR (500 MHz,  $\text{CDCl}_3$ ):  $\delta$  7.37 (s, 1 H), 7.27 (s, 1 H), 7.20 (s, 1 H), 7.05 (s, 1 H), 6.42 (d,  $J = 16.0$  Hz, 1 H), 6.27 (td,  $J = 16.0, 7.0$  Hz, 1 H), 6.00 (s, 2 H), 2.56 (s, 3 H), 2.22 (q,  $J = 7.0$  Hz, 2 H), 1.48 (quin,  $J = 7.0$  Hz, 2 H), 1.32~1.28 (m, 8 H), 0.88 (t,  $J = 7.0$  Hz, 3 H);  $^{13}\text{C}$  NMR (125 MHz,  $\text{CDCl}_3$ ):  $\delta$  144.3, 147.3, 133.7, 133.3, 130.8, 130.7, 129.7, 128.6, 123.1, 123.0, 104.4, 100.9, 100.7, 33.1, 31.8, 29.5 (x2), 29.2, 22.7, 19.9, 14.1, HRMS calcd for  $\text{C}_{21}\text{H}_{26}\text{O}_2$ ; 310.1933; found 310.1932.

**Spectral data for 6-fluoro-1-methyl-3-((*E*)-non-1-enyl)naphthalene (41):**

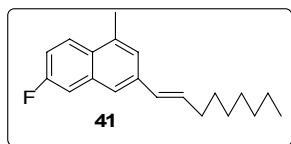

IR (neat,  $\text{cm}^{-1}$ ): 1661 (s);  $^1\text{H}$  NMR (500 MHz,  $\text{CDCl}_3$ ):  $\delta$  7.88 (dd,  $J = 9.2, 5.6$  Hz, 1H), 7.45 ~ 7.36 (m, 3 H), 7.26 ~ 7.17 (m, 1 H), 6.47 (d,  $J = 15.6$  Hz, 1 H), 6.36 (td,  $J = 15.6, 6.8$  Hz, 1 H), 2.43 (s, 3 H), 2.28 (q,  $J = 7.0$  Hz, 2 H), 1.49 (quin,  $J = 7.0$  Hz, 2 H), 1.36 ~ 1.27 (m, 8 H), 0.89 (t,  $J = 6.8$  Hz, 3 H),  $^{13}\text{C}$  NMR (100 MHz,  $\text{CDCl}_3$ ):  $\delta$  160.7 (d,  $J_{\text{CF}} = 243.4$  Hz), 136.2, 134.9, 134.8, 134.4, 132.2, 129.5, 126.4, 123.5, 123.1, 115.1 (d,  $J_{\text{CF}} = 24.5$  Hz), 111.3 (d,  $J_{\text{CF}} = 19.9$  Hz), 33.2, 31.8, 29.4, 29.2 (x $\text{CH}_2$ ), 22.7, 19.5, 14.1, HRMS calcd for  $\text{C}_{20}\text{H}_{25}\text{F}$ ; 284.1940; found 284.1944.

**Spectral data for (1-methylnaphalen-3-yl)methanol (42):**

# Supplementary Material (ESI) for Chemical Communications  
# This journal is (c) The Royal Society of Chemistry 2007

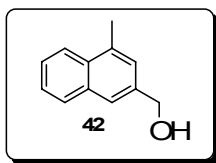

IR (neat,  $\text{cm}^{-1}$ ): 3647 (m), 1056 (s);  $^1\text{H}$  NMR (400 MHz,  $\text{CDCl}_3$ ):  $\delta$  7.98~7.95 (m, 1 H), 7.65 (s, 1 H), 7.83~7.81 (m, 1 H), 7.52~7.46 (m, 2 H), 7.32 (s, 1 H), 4.80 (s, 2 H), 2.68 (s, 3 H);  $^{13}\text{C}$  NMR (100 MHz,  $\text{CDCl}_3$ ):  $\delta$  137.8, 134.6, 133.4, 131.9, 128.4, 125.8, 125.7, 125.6, 123.9, 123.7, 65.0, 19.2; HRMS calcd for  $\text{C}_{12}\text{H}_{12}\text{O}$ : 172.0888; found 172.0886.
